# Supplementary material for: Modified Naples yellow in Renaissance majolica: study of Pb–Sb–Zn and Pb–Sb–Fe ternary pyroantimonates by X-ray absorption spectroscopy
Source: Royal Society of Chemistry journal article supplement (doi:10.1039/c1ja10190k), 2011-01-01
Supplement: c1ja10190k.pdf [file c1ja10190k.pdf]

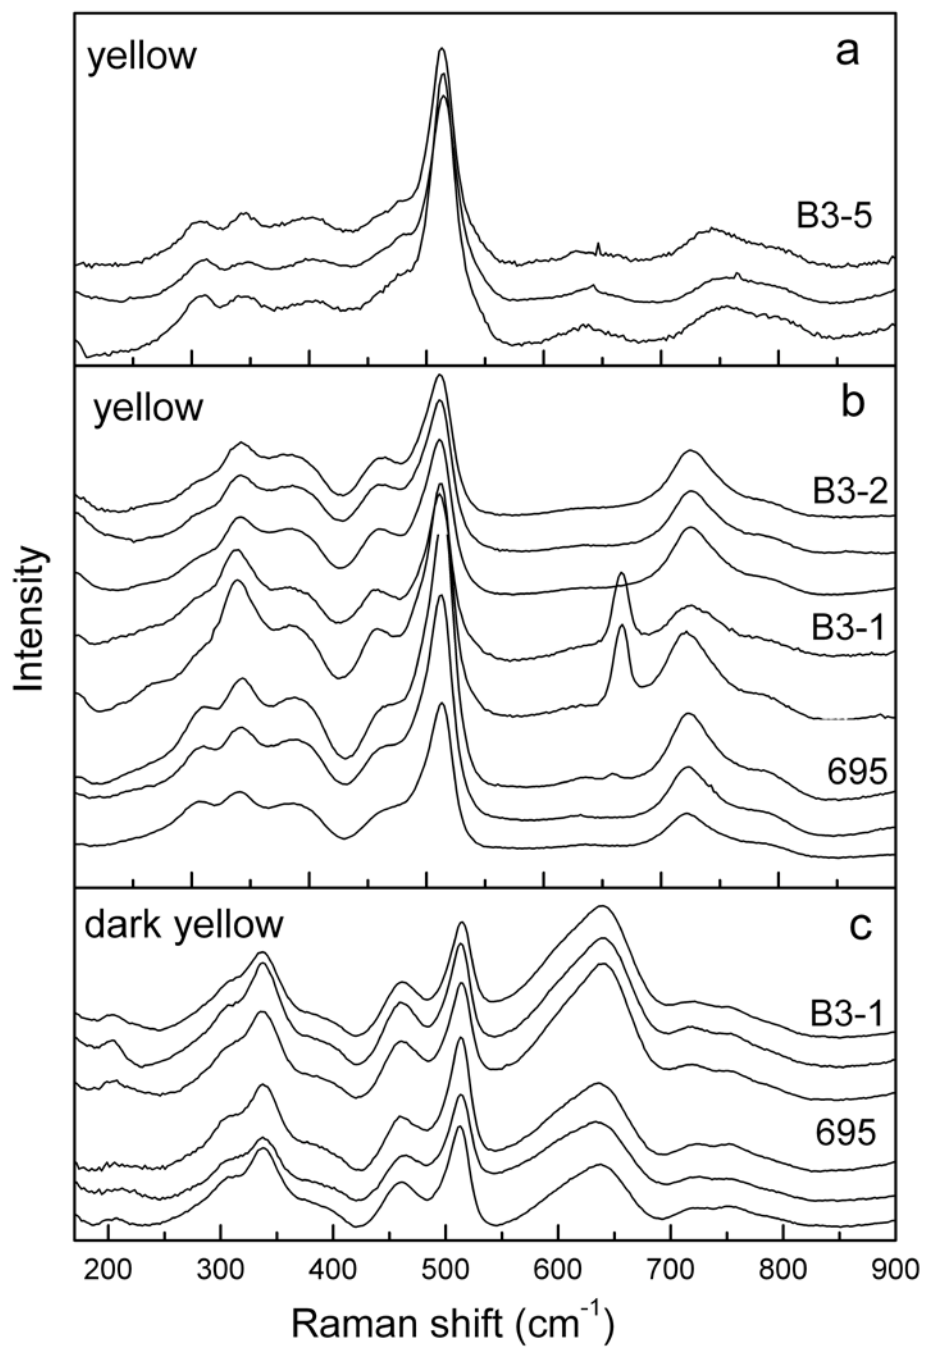

Supplementary micro-Raman spectra collected on the yellow and dark yellow glazes of the ancient samples containing Naples yellow. a) unmodified, b) partially modified and c) strongly modified Raman spectra of Naples yellow.
